# Supplementary material
Source: HighWire-hosted journal article supplement (https://jnm.snmjournals.org/highwire/filestream/94460/field_highwire_adjunct_files/0/118232_Supplemental_Data.pdf)
Supplement: 118232_Supplemental_Data.pdf [file 118232_Supplemental_Data.pdf]

**SUPPLEMENTAL TABLE 1**

Tariquidar Concentrations in Plasma ( $\mu\text{g/mL}$ ) of Individual Subjects

| Subject                                               | $^{11}\text{C}$ -tariquidar |      |      |      |      | $^{11}\text{C}$ -elacridar |      |      |      |      |      |
|-------------------------------------------------------|-----------------------------|------|------|------|------|----------------------------|------|------|------|------|------|
|                                                       | 01                          | 02   | 03   | 04   | 05*  | 06                         | 07   | 08   | 09   | 10   | 11   |
| End infusion                                          | 1.60                        | 2.56 | 2.97 | 2.51 | 2.77 | 2.73                       | 2.91 | 2.21 | 2.22 | 2.33 | 1.61 |
| End scan 1                                            | 0.57                        | 0.55 | 0.74 | 0.46 | 0.46 | 0.39                       | 0.88 | 0.58 | 0.38 | 0.63 | 0.46 |
| Begin scan 2                                          | 0.51                        | n.d. | 0.54 | 0.36 | 0.35 | 0.50                       | 0.61 | 0.39 | 0.28 | 0.63 | 0.34 |
| End scan 2                                            | 0.38                        | n.d. | 0.41 | 0.46 | 0.31 | 0.46                       | 0.54 | 0.64 | 0.30 | 0.77 | 0.52 |
| AUC ( $\mu\text{g}\cdot\text{h}\cdot\text{mL}^{-1}$ ) | 1.93                        | n.d. | 2.78 | 2.18 | 2.24 | 2.38                       | 2.99 | 2.25 | 1.82 | 2.65 | 1.76 |

AUC = area under the concentration time-curve; n.d. = not determined.

\*Excluded from PET data analysis due to lack of input function.

## SUPPLEMENTAL TABLE 2

Outcome Parameters for Whole-Brain Gray Matter of the 1T2K and 2T4K\* Models for <sup>11</sup>C-Tarividar and <sup>11</sup>C-Elacridar Using Plasma Input Function Corrected for Polar Radiolabeled Metabolites

|                                                    | 1T2K                           |                                | 2T4K                           |                                |
|----------------------------------------------------|--------------------------------|--------------------------------|--------------------------------|--------------------------------|
|                                                    | <sup>11</sup> C-tarividar      | <sup>11</sup> C-elacridar      | <sup>11</sup> C-tarividar      | <sup>11</sup> C-elacridar      |
| $K_1$<br>(mL·mL <sup>-1</sup> ·min <sup>-1</sup> ) | 0.003 ± 0.002<br>(0.002–0.005) | 0.003 ± 0.001<br>(0.002–0.004) | 0.004 ± 0.001<br>(0.003–0.004) | 0.005 ± 0.001<br>(0.004–0.006) |
| $k_2$ (min <sup>-1</sup> )                         | 0.012 ± 0.003<br>(0.009–0.014) | 0.012 ± 0.003<br>(0.009–0.015) | 0.081 ± 0.022<br>(0.062–0.100) | 0.118 ± 0.022<br>(0.096–0.139) |
| $k_3$ (min <sup>-1</sup> )                         |                                |                                | 0.096 ± 0.025<br>(0.074–0.117) | 0.107 ± 0.042<br>(0.065–0.148) |
| $k_4$ (min <sup>-1</sup> )                         |                                |                                | 0.012 ± 0.008<br>(0.006–0.019) | 0.013 ± 0.007<br>(0.006–0.019) |
| $V_T$ (mL·mL <sup>-1</sup> )                       | 0.27 ± 0.07<br>(0.22–0.33)     | 0.27 ± 0.10<br>(0.17–0.36)     | 0.54 ± 0.24<br>(0.33–0.75)     | 0.47 ± 0.12<br>(0.36–0.58)     |
| $V_b$                                              | 0.050 ± 0.008<br>(0.042–0.057) | 0.045 ± 0.003<br>(0.043–0.048) | 0.046 ± 0.006<br>(0.041–0.051) | 0.041 ± 0.004<br>(0.037–0.045) |
| AIC                                                | -31.7 ± 8.4                    | -31.4 ± 9.3                    | -42.5 ± 6.4                    | -49.5 ± 2.0                    |

\*Data from 0 to 60 min was used for analysis.

Outcome parameters are given as mean ± SD (<sup>11</sup>C-tarividar:  $n = 5$ , <sup>11</sup>C-elacridar:  $n = 4$ , subject 10 excluded). In parentheses the 95% confidence intervals of the mean parameter estimates are given.  $K_1$ ,  $k_2$ ,  $k_3$ ,  $k_4$  = rate constants for exchange of radioactivity between plasma and brain compartments;  $V_T$  = distribution volume;  $V_b$  = blood volume fraction in brain; AIC = Akaike information criterion.

### SUPPLEMENTAL TABLE 3

Single Nucleotide Polymorphisms in the *ABCG2* and *ABCB1*

Genes of Individual Subjects

| Subject | <i>ABCG2</i> |        | <i>ABCB1</i> |        |
|---------|--------------|--------|--------------|--------|
|         | C421A        | C1236T | G2677T       | C3435T |
| 01      | 0            | 0      | 0            | 1      |
| 02      | 0            | 0      | 0            | 0      |
| 03      | 0            | 0      | 0            | 0      |
| 04      | n.d.         | n.d.   | n.d.         | n.d.   |
| 05*     | 0            | 0      | 0            | 0      |
| 06      | 1            | 1      | 2            | 1      |
| 07      | 1            | 0      | 0            | 1      |
| 08      | 1            | 0      | 0            | 0      |
| 09      | 0            | 0      | 0            | 1      |
| 10      | 0            | 2      | 2            | 2      |
| 11      | 0            | 2      | 2            | 1      |

n.d. = not determined; 0 = wild-type; 1 = heterozygous mutant; 2 = homozygous mutant.

\*Excluded from PET data analysis due to lack of input function.

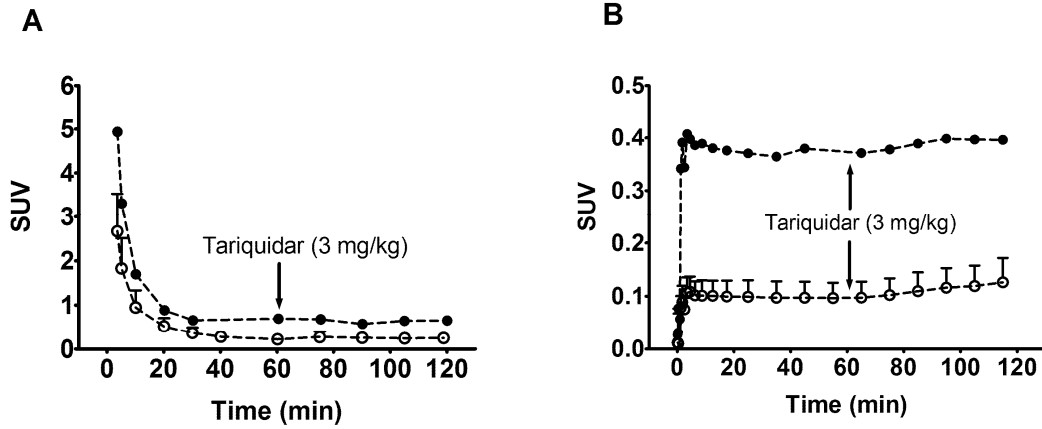

**SUPPLEMENTAL FIGURE 1.** Mean (+SD) time–activity curves of  $^{11}\text{C}$ -elacridar (○,  $n = 4$ , subject 10 not included) and individual time–activity curves of subject 10 (●) in arterial plasma, uncorrected for radiolabeled metabolites (A), and in whole-brain gray matter, corrected for radioactivity in vasculature (B). The start of intravenous tariquidar infusion (3 mg/kg, over 30 min) is indicated by an arrow.

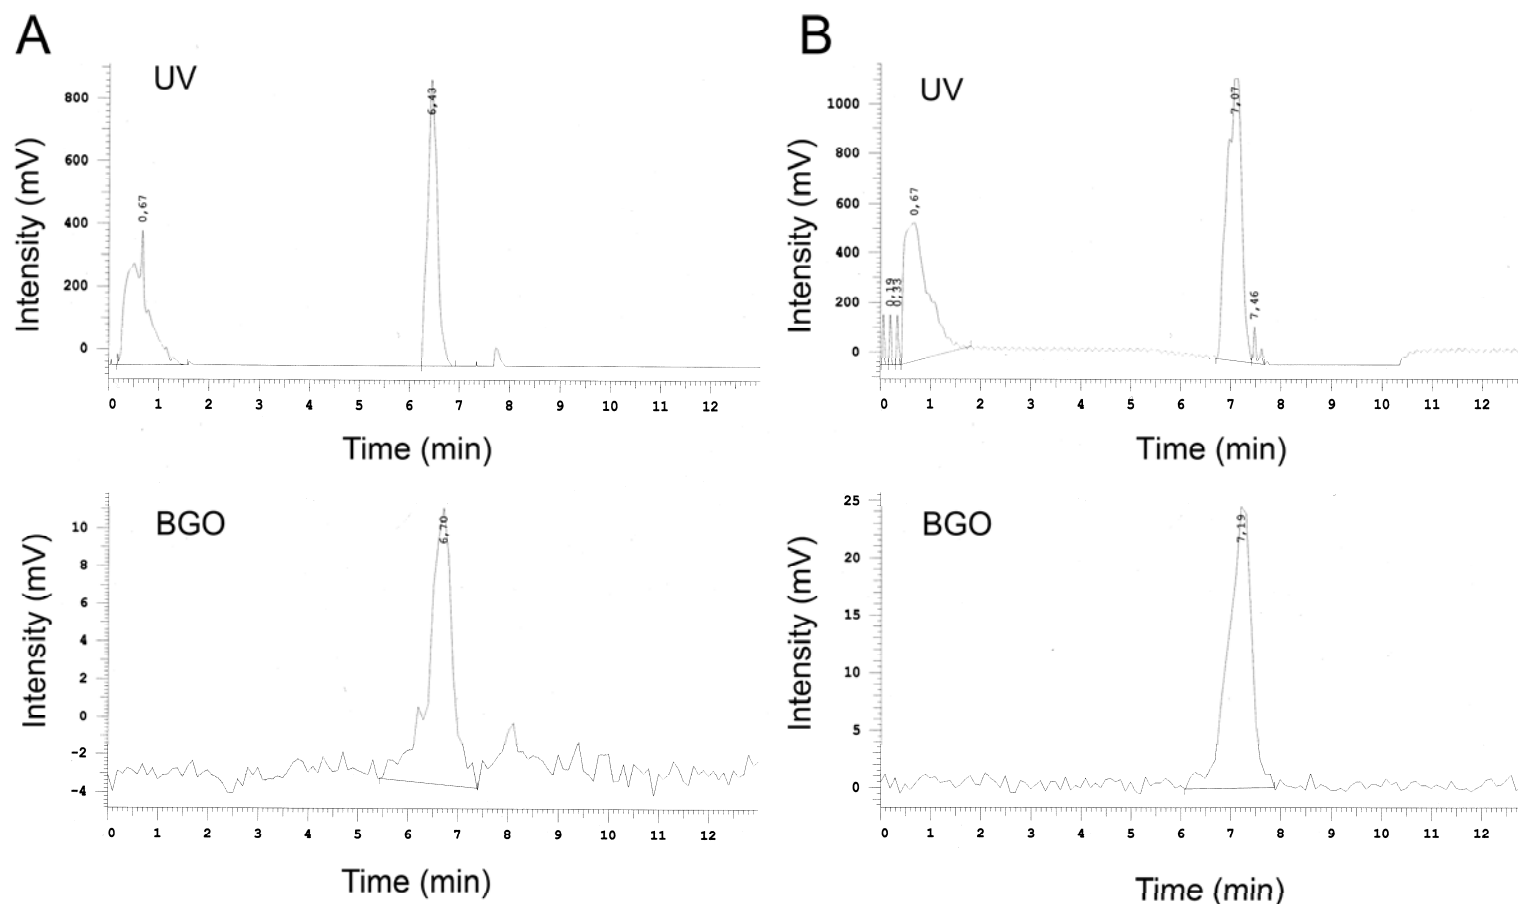

**SUPPLEMENTAL FIGURE 2.** Representative radio-HPLC chromatograms of methanol/buffer eluates obtained from solid-phase extraction assay of plasma samples collected at 30 min after intravenous injection of  $^{11}\text{C}$ -tarividar (A) or  $^{11}\text{C}$ -elacridar (B). A Chromolith Performance RP-18e (100-4.6 mm) HPLC column (Merck) was eluted at a flow rate of 4 mL/min with aqueous ammonium acetate buffer (0.2 M, pH 5.0, solvent A) and acetonitrile (solvent B) using the following binary gradient: 0–4 min, 20% B; 4–9 min, 20%–53% B; 9.1 min, 20% B; 9.1–13 min, 20% B. Ultraviolet (UV) detection was performed at a wavelength of 227 nm, and injected volume was 2 mL. The upper channel represents UV detection and the lower channel radioactivity detection (bismuth germanate, BGO). Samples were spiked with unlabeled tarividar or elacridar.
